# Supplementary material
Source: PubMed Central journal article supplement (PMC4764033)
Supplement: supp_dc15-1759v151759_DC151759SupplementaryData.pdf [file supp_dc15-1759v151759_DC151759SupplementaryData.pdf]

## SUPPLEMENTARY DATA

The association of gestational diabetes mellitus with left ventricular structure and function: the CARDIA study

Duke Appiah, PhD, MPH; Pamela J. Schreiner, PhD; Erica P. Gunderson, PhD, MS, MPH; Suma H. Konety, MD; David R. Jacobs Jr, PhD; Chike C. Nwabuo, MD, MPH; Imo A. Ebong, MD, MS; Hilary K. Whitham, PhD, MPH; David C. Goff Jr, MD, PhD; Joao A. Lima, MD; Ivy A. Ku, MD; Samuel S. Gidding, MD

SUPPLEMENTARY DATA

**Supplementary Table S1.** Echocardiography measures (unadjusted) among women by gestational diabetes mellitus (GDM) status at year 5

| Year 5                              | Year 25        |                   | P value |
|-------------------------------------|----------------|-------------------|---------|
|                                     | GDM<br>(n= 64) | No GDM<br>(n=954) |         |
|                                     | Mean (SD)      | Mean (SD)         |         |
| Left ventricular structure          |                |                   |         |
| LV mass (g)                         | 119.4 (30.4)   | 125.4 (33.7)      | 0.1716  |
| LV mass index (g/m)                 | 68.9 (13.6)    | 72.6 (15.9)       | 0.0775  |
| LV mass/ volume ratio               | 1.0 (0.2)      | 1.2 (0.2)         | 0.0155  |
| LV end systolic volume index (ml/m) | 23.8 (6.8)     | 23.0 (6.6)        | 0.5397  |
| Relative wall thickness             | 0.32 (0.1)     | 0.33 (0.1)        | 0.0571  |
| Left ventricular systolic function  |                |                   |         |
| Stroke Volume (ml)                  | 70.6 (15.4)    | 70.7 (18.8)       | 0.9838  |
| Cardiac Output (L/min)              | 4.7 (1.3)      | 4.7 (1.5)         | 0.8773  |
| LV ejection fraction (%)            | 63.8 (6.9)     | 63.8 (6.5)        | 0.9540  |
| Left ventricular Diastolic function |                |                   |         |
| E/A ratio                           | 0.014 (0.11)   | 0.002 (0.04)      | 0.0670  |

SUPPLEMENTARY DATA

**Supplementary Table S2.** Adjusted mean difference in measures of LV function assessed at year 25 comparing women with GDM to non-GDM women.

|                                                 | Model 1              |         | Model 2 *            |         | Model 3              |         |
|-------------------------------------------------|----------------------|---------|----------------------|---------|----------------------|---------|
|                                                 | $\beta$ (95% CI)     | P value | $\beta$ (95% CI)     | P value | $\beta$ (95% CI)     | P value |
| Left ventricular systolic function              |                      |         |                      |         |                      |         |
| Four chamber longitudinal peak strain           | 0.74 (0.09, 1.39)    | 0.025   | 0.68 (0.03, 1.33)    | 0.041   | 0.68 (0.01, 1.36)    | 0.048   |
| Circumferential peak Strain                     | 0.83 (0.09, 1.57)    | 0.028   | 0.76 (0.02, 1.51)    | 0.044   | 0.71 (-0.05, 1.47)   | 0.066   |
| Radial peak Strain                              | 0.81 (-2.59, 4.21)   | 0.640   | 1.25 (-2.16, 4.67)   | 0.472   | 1.54 (-1.96, 5.03)   | 0.388   |
| Left ventricular Diastolic function             |                      |         |                      |         |                      |         |
| E/e' ratio                                      | 0.29 (-0.20, 0.79)   | 0.242   | 0.14 (-0.34, 0.63)   | 0.559   | 0.12 (-0.39, 0.63)   | 0.634   |
| Lateral e-wave prime velocity (cm/sec)          | -0.83 (-1.48, -0.18) | 0.012   | -0.70 (-1.34, -0.06) | 0.033   | -0.76 (-1.44, -0.09) | 0.026   |
| Septal e-wave prime velocity (cm/sec)           | -0.69 (-1.25, -0.13) | 0.015   | -0.59 (-1.15, -0.03) | 0.038   | -0.62 (-1.20, -0.04) | 0.036   |
| Left atrial volume index (ml/m <sup>2</sup> ) † | -1.60 (-3.49, 0.28)  | 0.095   | -1.41 (-3.30, 0.48)  | 0.1443  | -1.44 (-3.40, 0.52)  | 0.149   |

Model 1: adjusted for year 25 covariates (age, race, education, center, BMI, physical activity, parity, cigarette smoking, oral contraceptives, marijuana, alcohol intake, family history of CHD, systolic blood pressure and total cholesterol).

Model 2: model 1 plus metabolic syndrome

Model 3: model 1 plus type-2 diabetes

\*The metabolic syndrome was defined using the ATP-III criteria (abdominal obesity; waist circumference >88 cm), elevated blood pressure (systolic blood pressure  $\geq$ 130 mm Hg or diastolic blood pressure  $\geq$ 85 mm Hg or taking antihypertensive medication), low HDL cholesterol (HDL concentrations <50 mg/dL), high triglyceride concentrations ( $\geq$ 150 mg/dL), and high glucose concentrations [fasting glucose concentrations  $\geq$ 110 mg/dL or diagnosed with diabetes (ie, having blood glucose concentrations  $\geq$ 126 mg/dL or reported use of an oral hypoglycemic medication or insulin at examinations)].

† Models with Left atrial volume index to body surface area did not adjust for BMI

SUPPLEMENTARY DATA

**Supplementary Table S3.** Echocardiography measures (unadjusted) among women by type-2 diabetes status at year 25

|                                     | Year 25             |                        | P value |
|-------------------------------------|---------------------|------------------------|---------|
|                                     | Diabetes<br>(n= 52) | No diabetes<br>(n=557) |         |
|                                     | Mean (SD)           | Mean (SD)              |         |
| Left ventricular structure          |                     |                        |         |
| LV mass (g)                         | 169.1 (58.0)        | 142.1 (39.4)           | 0.0033  |
| LV mass index (g/m)                 | 83.9 (24.2)         | 77.3 (18.8)            | 0.0261  |
| LV mass/ volume ratio               | 1.7 (0.7)           | 1.5 (0.4)              | 0.0833  |
| LV end systolic volume index (ml/m) | 20.5 (7.1)          | 19.0 (6.7)             | 0.1639  |
| Relative wall thickness             | 0.38 (0.1)          | 0.34 (0.1)             | 0.0046  |
| Left ventricular systolic function  |                     |                        |         |
| Stroke Volume (ml)                  | 65.0 (17.7)         | 60.6 (13.9)            | 0.1057  |
| Cardiac Output (L/min)              | 4.7 (1.1)           | 4.0 (1.0)              | 0.0001  |
| LV ejection fraction (%)            | 60.4 (9.7)          | 61.8 (6.7)             | 0.2933  |
| Left ventricular Diastolic function |                     |                        |         |
| E/A ratio                           | 1.19 (0.3)          | 1.34 (0.4)             | 0.0107  |

SUPPLEMENTARY DATA

**Supplementary Table S4.** Echocardiography measures assessed only at year 25 (unadjusted) among women by type-2 diabetes status

|                                               | Year 25             |                         | P value |
|-----------------------------------------------|---------------------|-------------------------|---------|
|                                               | Diabetes<br>(n= 52) | No Diabetes<br>(n= 557) |         |
|                                               | Mean (SD)           | Mean (SD)               |         |
| Left ventricular systolic function            |                     |                         |         |
| Four chamber longitudinal peak strain         | -14.7 (3.0)         | -15.8 (2.3)             | 0.0390  |
| Circumferential peak Strain                   | -14.7 (2.7)         | -15.7 (2.7)             | 0.0202  |
| Radial peak Strain                            | 35.7 (14.3)         | 36.6 (11.6)             | 0.6801  |
| Left ventricular Diastolic function           |                     |                         |         |
| E/e' ratio                                    | 9.3 (2.4)           | 7.7 (2.0)               | 0.0001  |
| Lateral e' wave velocity (cm/sec)             | 10.7 (3.0)          | 12.2 (2.7)              | 0.0003  |
| Septal e' wave velocity (cm/sec)              | 8.6 (2.3)           | 9.9 (2.4)               | 0.0004  |
| Left atrial volume index (ml/m <sup>2</sup> ) | 24.6 (6.9)          | 25.0 (7.0)              | 0.7323  |

SUPPLEMENTARY DATA

**Supplementary Table S5.** Mean 20-year change in echocardiographic measures of left ventricular structure and function according to gestational diabetes and incident type-2 diabetes status

|                                                   | Unadjusted                    |                           |                           |                        |       | Adjusted                      |                           |                           |                        |       |
|---------------------------------------------------|-------------------------------|---------------------------|---------------------------|------------------------|-------|-------------------------------|---------------------------|---------------------------|------------------------|-------|
|                                                   | No GDM,<br>No T2DM<br>(N=512) | GDM, No<br>T2DM<br>(N=45) | No GDM,<br>T2DM<br>(N=33) | GDM,<br>T2DM<br>(N=19) | P     | No GDM,<br>No T2DM<br>(N=512) | GDM, No<br>T2DM<br>(N=45) | No GDM,<br>T2DM<br>(N=33) | GDM,<br>T2DM<br>(N=19) | P     |
| Left ventricular structure                        |                               |                           |                           |                        |       |                               |                           |                           |                        |       |
| LV mass (g)                                       | 18.2                          | 30.8                      | 30.8                      | 49.5                   | 0.002 | 18.7                          | 30.7                      | 17.6                      | 44.9                   | 0.018 |
| LV mass index (g/m <sup>2</sup> )                 | 4.6                           | 12.4                      | 9.5                       | 19.3                   | 0.003 | 5.3                           | 12.5                      | 4.9                       | 16.3                   | 0.032 |
| LV mass/ volume ratio                             | 0.32                          | 0.42                      | 0.32                      | 0.70                   | 0.192 | 0.30                          | 0.23                      | 0.19                      | 0.67                   | 0.232 |
| LV end-systolic volume index (ml/m <sup>2</sup> ) | -4.0                          | -5.9                      | -4.2                      | -1.2                   | 0.604 | -7.5                          | -8.3                      | -8.2                      | -6.0                   | 0.932 |
| Relative wall thickness                           | 0.006                         | 0.030                     | 0.049                     | 0.034                  | 0.010 | 0.007                         | 0.023                     | 0.041                     | 0.040                  | 0.075 |
| Left ventricular systolic function                |                               |                           |                           |                        |       |                               |                           |                           |                        |       |
| Stroke Volume (ml)                                | -9.3                          | -5.0                      | -2.2                      | -18.7                  | 0.322 | -9.1                          | -3.6                      | -5.3                      | -22.5                  | 0.271 |
| Cardiac Output (L/min)                            | -0.70                         | -0.29                     | 0.29                      | -1.10                  | 0.202 | -0.72                         | -0.48                     | -0.02                     | -1.48                  | 0.384 |
| LV ejection fraction (%)                          | -1.8                          | -2.6                      | -2.0                      | -4.7                   | 0.828 | -0.66                         | -3.46                     | -0.76                     | -3.16                  | 0.654 |
| Left ventricular Diastolic function               |                               |                           |                           |                        |       |                               |                           |                           |                        |       |
| E/A ratio                                         | 1.4                           | 1.3                       | 1.2                       | 1.2                    | 0.048 | 1.3                           | 1.3                       | 1.3                       | 1.2                    | 0.757 |

Adjusted for for year 5 covariates (age, race, education, center, BMI, physical activity, parity, cigarette smoking, oral contraceptives, marijuana, alcohol intake, family history of CHD, systolic blood pressure and total cholesterol).and change in weight and systolic blood pressure during follow-u

SUPPLEMENTARY DATA

**Supplementary Figure S1.** Flow chart of study sample selection; CARDIA: Coronary Artery Risk Development in Young Adults study

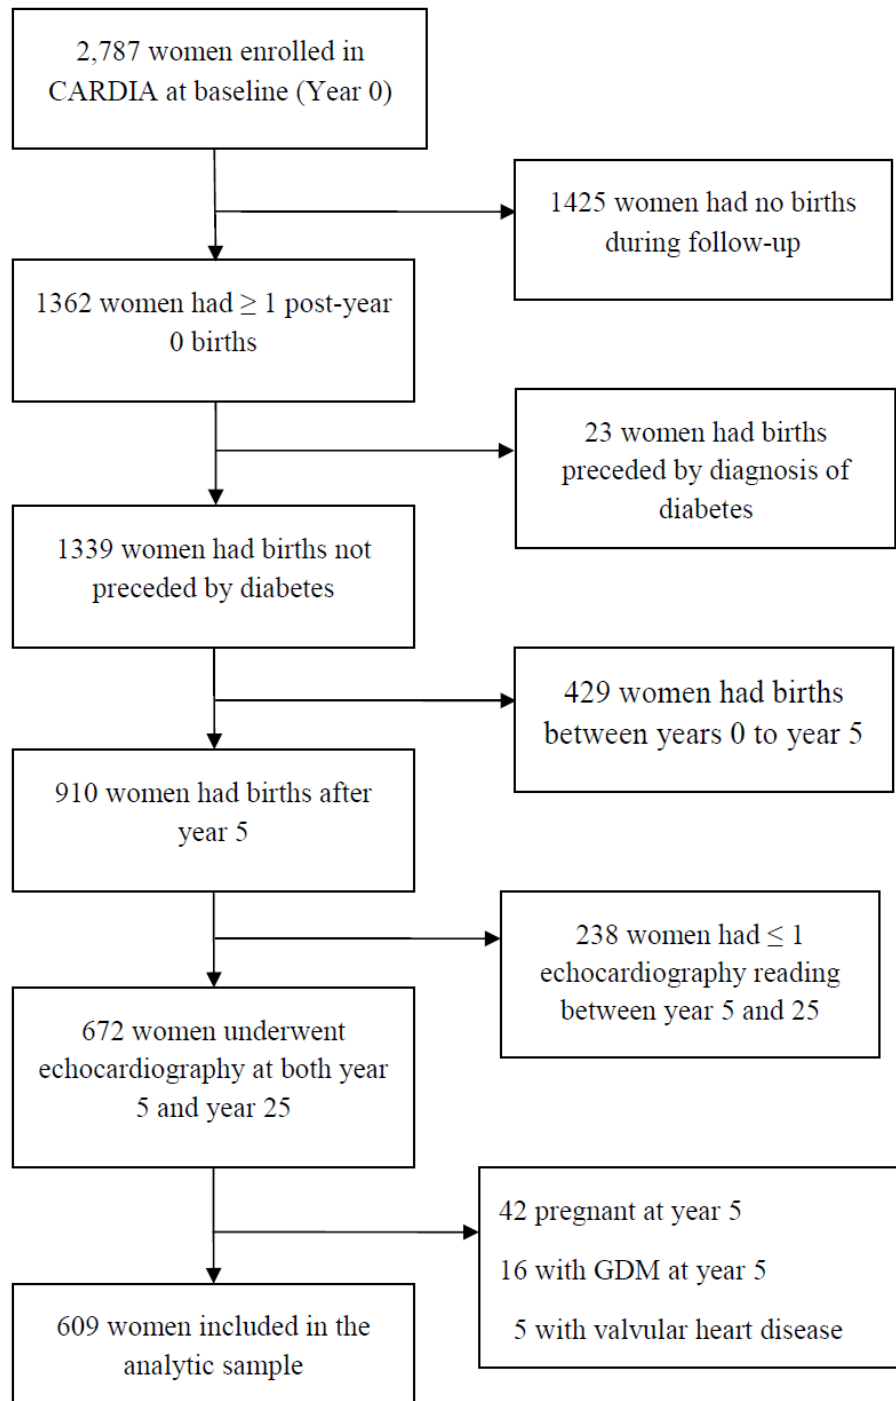

SUPPLEMENTARY DATA

**Supplementary Figure S2.** Estimated mean fasting glucose levels before and after the index pregnancy (first GDM or non GDM pregnancy)

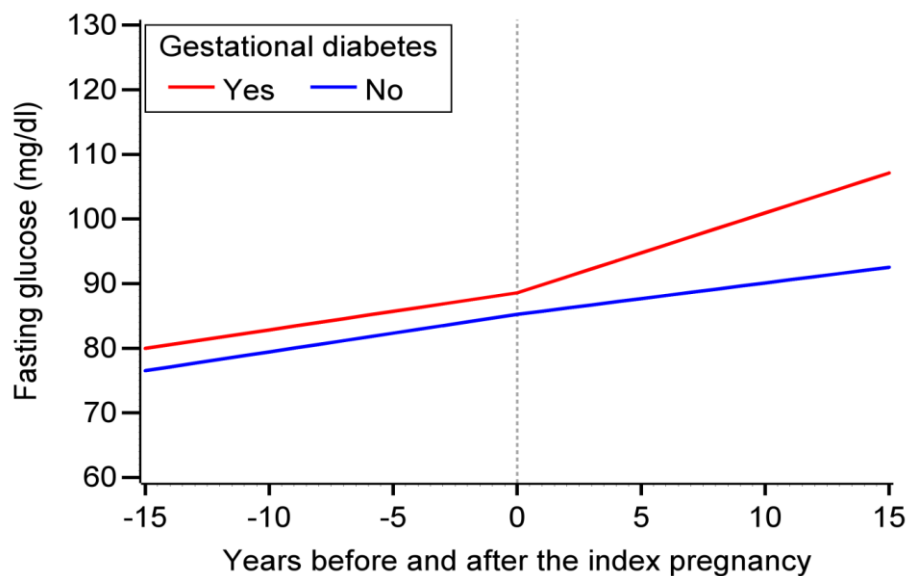



## SUPPLEMENTARY DATA

### APPENDIX

#### FIELD CENTERS

University of Alabama at Birmingham: Cora E. Lewis, MD, MSPH

Northwestern University: Donald M. Lloyd-Jones, MD, ScM, Kiang Liu, PhD, Mercedes R. Carnethon, PhD

University of Minnesota: Pamela J. Schreiner, PhD, MS, MS, David R. Jacobs, Jr., PhD  
Kaiser Permanente Stephen Sidney, MD, MPH

#### COORDINATING CENTER

University of Alabama at Birmingham: James M. Shikany, DrPH, Sejong Bae, PhD

#### STEERING COMMITTEE

Colorado School of Public Health: David C. Goff, Jr., MD, PhD

#### READING CENTERS

Johns Hopkins University, School of Medicine Echocardiography Reading Center: Joao A.C. Lima, MD, MBA

#### LABORATORIES

Institute of Molecular Medicine, DNA Laboratory: Myriam Fornage, PhD

Solomon Park Research Laboratories, Central Blood and Urine Repository : Patric A. Clapshaw, PhD

Northwest Lipid Metabolism and Diabetes Research Laboratories: Santica M. Marcovina, PhD, ScD

Molecular Epidemiology and Biomarker Research Laboratory, Blood and Urine Chemistries Laboratory: Myron Gross, PhD, MS
